# Supplementary material for: Exploring the Bioactive Mycocompounds (Fungal Compounds) of Selected Medicinal Mushrooms and Their Potentials against HPV Infection and Associated Cancer in Humans
Source: MDPI journal article supplement (doi:10.3390/life13010244), 2023-01-16
Supplement: s1 [file s1]

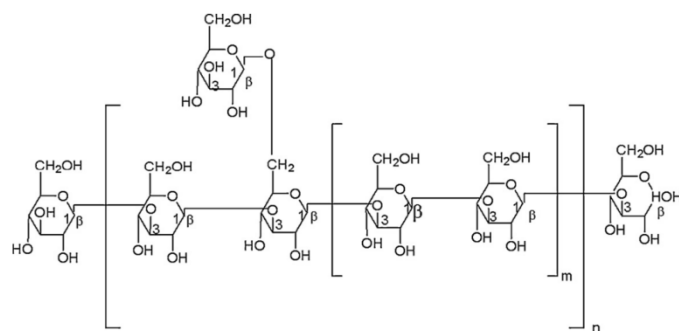

Figure S1 Polysaccharide portions of the polysaccharide peptide (PSP) of COV-1 strain of *Coriolus versicolor* [101].

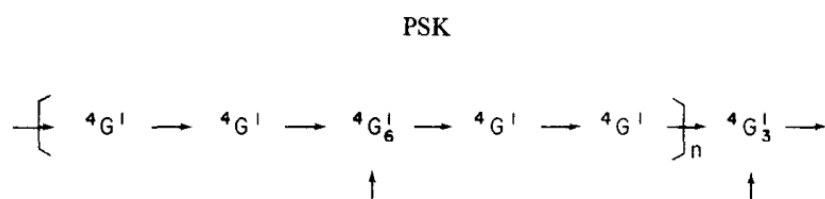

Figure S2 Structure of major saccharide portion of PSK, G : B-D-Glucopyranose [103].

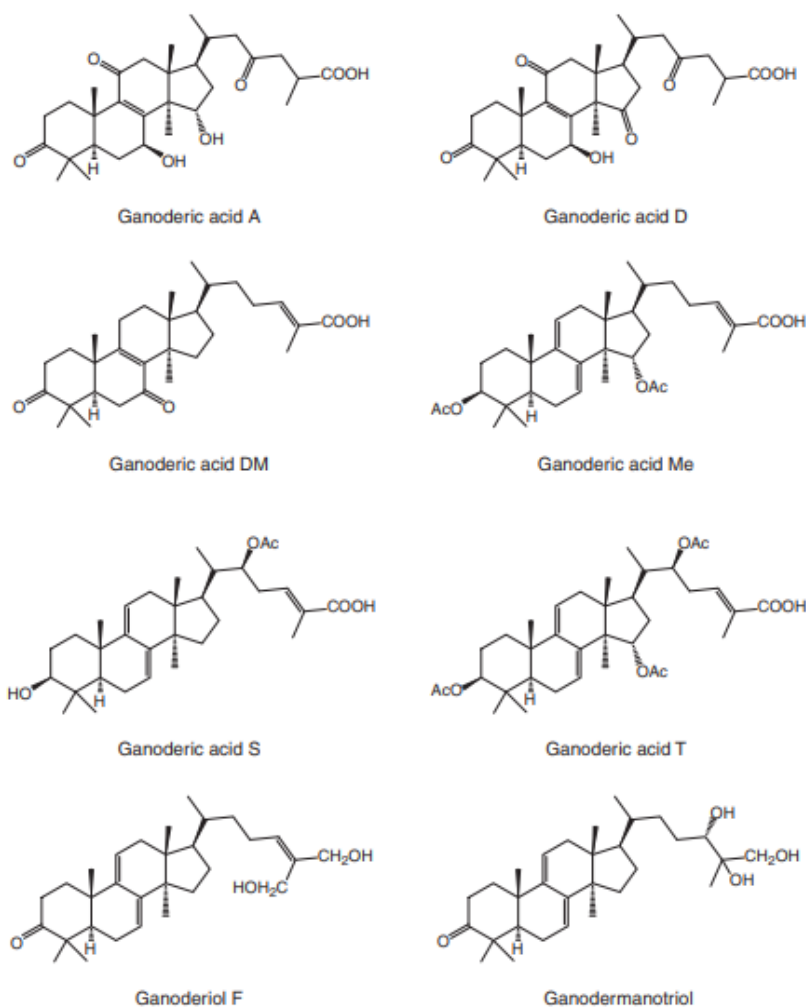

Figure S3 Structures of triterpenoids isolated from *G. lucidum* [105].

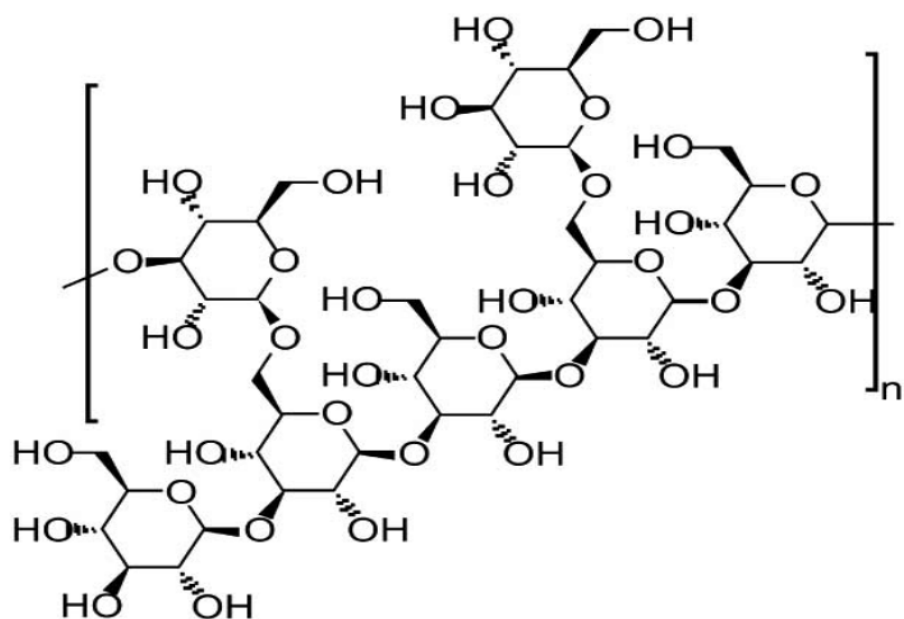

Figure S4 Structure of lentinan [106].

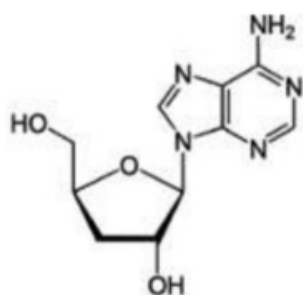

Figure S5 Structure of cordycepin [95].

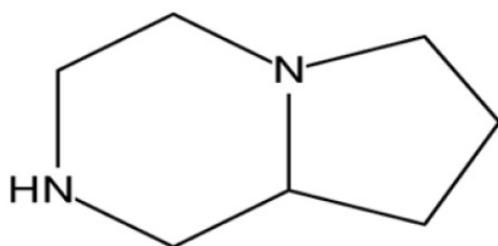

Figure S6 Structure of L. squarrosulus - octahydropyrrolo[1,2-a]pyrazine [112].

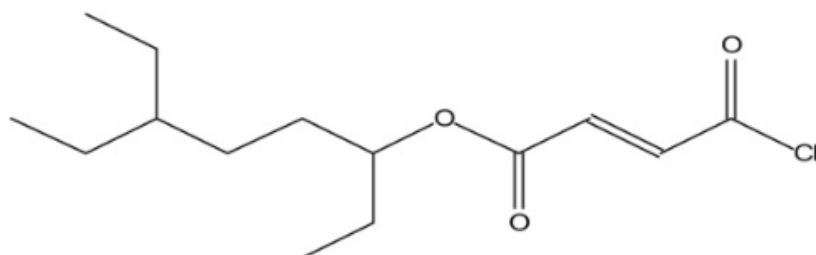

Figure S7 Structure of L. squarrosulus - fumaric acid, monochlorid, 6-ethyloct-3-yl ester[112].
